# Supplementary material for: Enhancer histone-QTLs are enriched on autoimmune risk haplotypes and influence gene expression within chromatin networks
Source: PubMed Central journal article supplement (PMC6060153; doi:10.1038/s41467-018-05328-9), 2018-07-25
Supplement: 41467_2018_5328_MOESM1_ESM.pdf [file 41467_2018_5328_MOESM1_ESM.pdf]

## Supplementary Information

Enhancer histone-QTLs are enriched on autoimmune risk haplotypes and influence gene expression within chromatin networks

Pelikan et al.

Supplementary Figure 1. QQ plots of p-values from the CHT test for association between allele dosage and epigenetic read counts. The y-axis indicates the observed  $-\log_{10}(p)$  versus expected  $-\log_{10}(p)$  on the x-axis. Black points indicate statistics for the observed data and red points indicate statistics for the permuted data. The ordinal is drawn as a solid red line. H3K27ac is the top panel and H3K4me1 is the bottom panel.

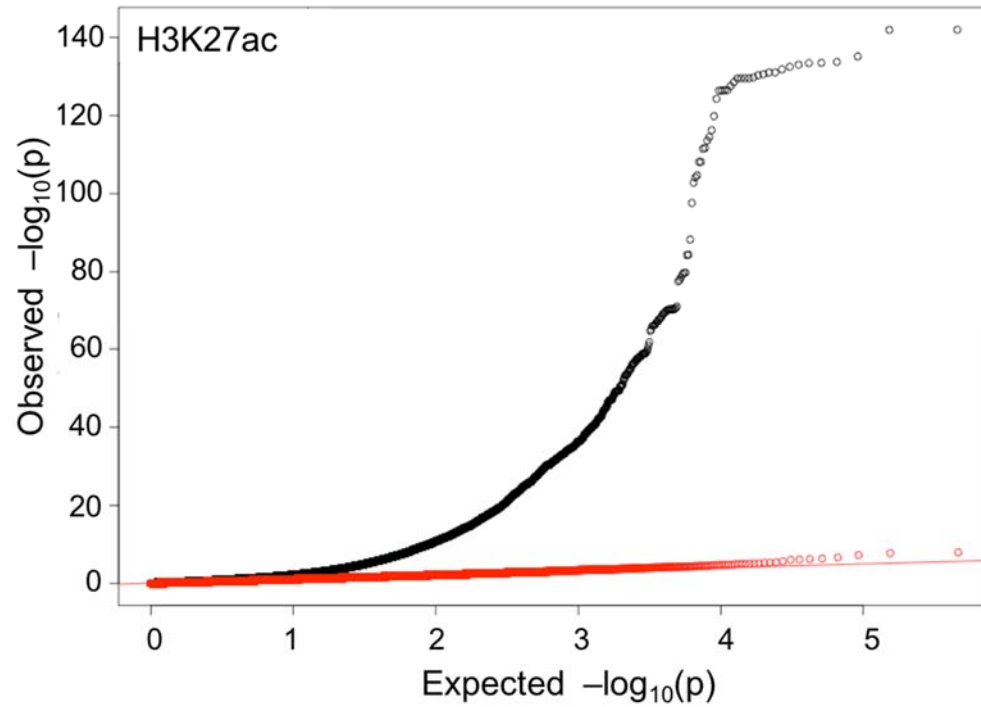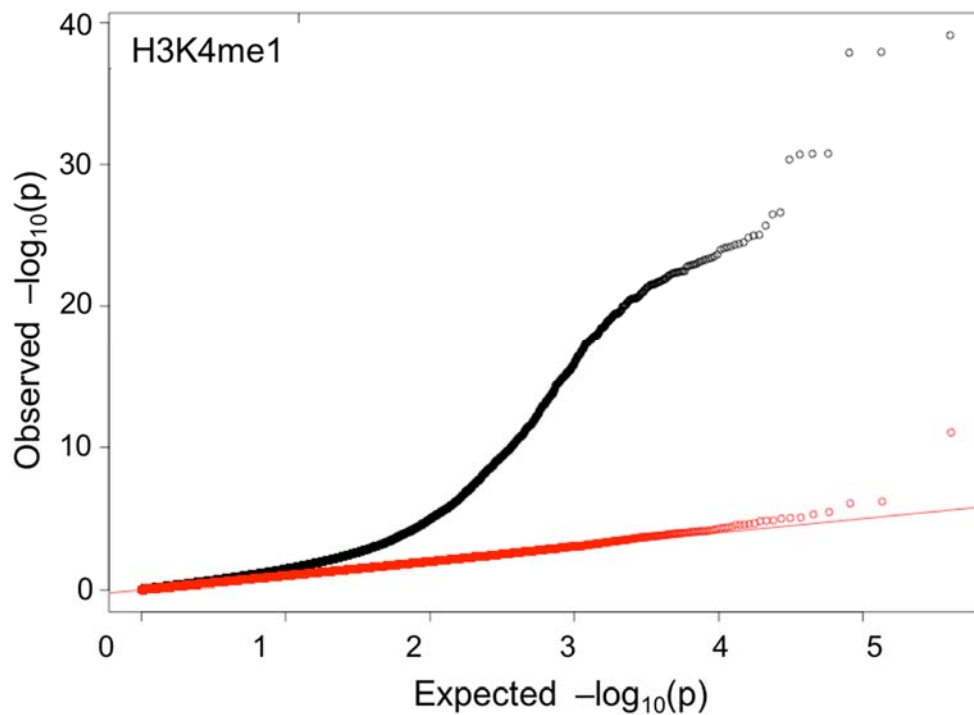

Supplementary Figure 2. H3K27a ChIP-seq read depth comparison between discovery (original) and replication samples. On average, the discovery cohort ChIP-seq data are, on average, 3.3 times deeper than the replication study ChIP-seq data. Box plots are presented by study (original 25 samples – blue; replication 10 samples – red) on the x-axis and sequencing reads (in millions) are plotted on the y-axis.

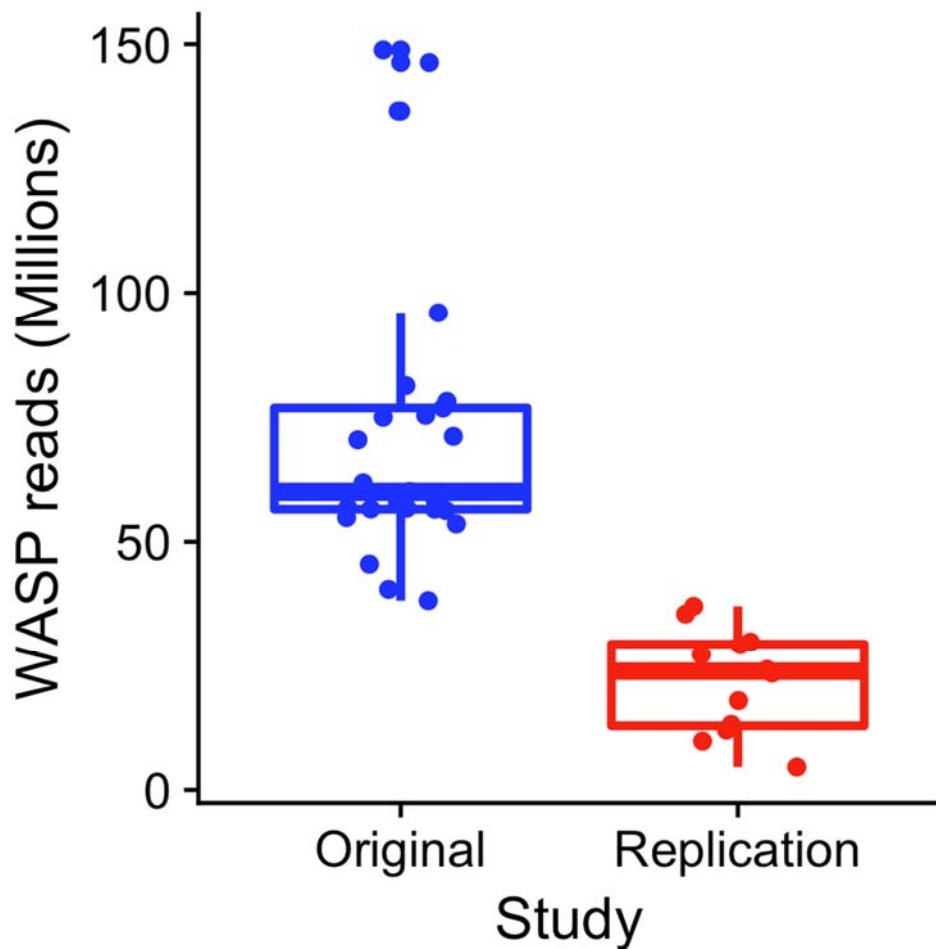

Supplementary Figure 3. Chromatin states and motif enrichment in H3K27ac and H3K4me1 consensus peaks.

A. Predicted chromatin states of H3K27ac (black) and H3K4me1 (grey) consensus peaks. The majority of consensus peaks are primarily in enhancers, promoters, and transcriptional events. B. Motif enrichment of B cell lineage transcription factor binding sites within H3K27ac and H3K4me1 consensus peaks. Motif enrichment is plotted on the x-axis and the  $-\log_{10}(p)$  on the y-axis.

A.

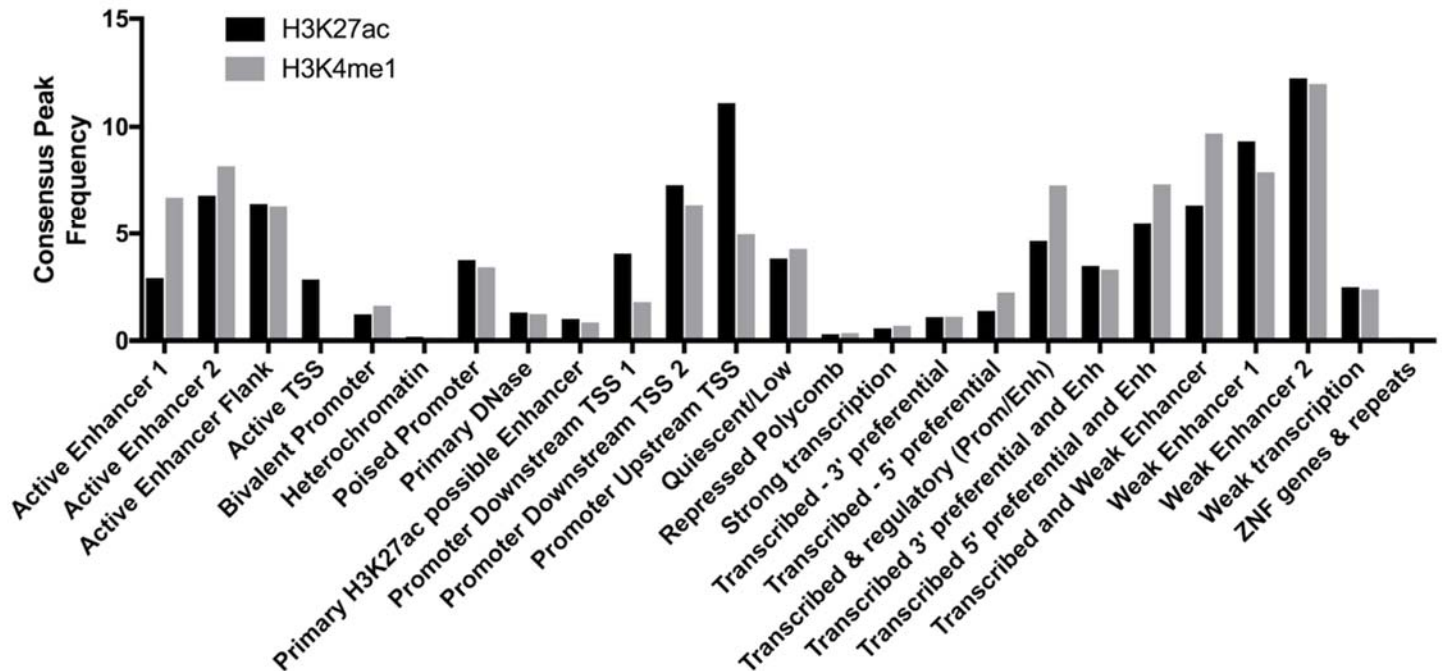

B.

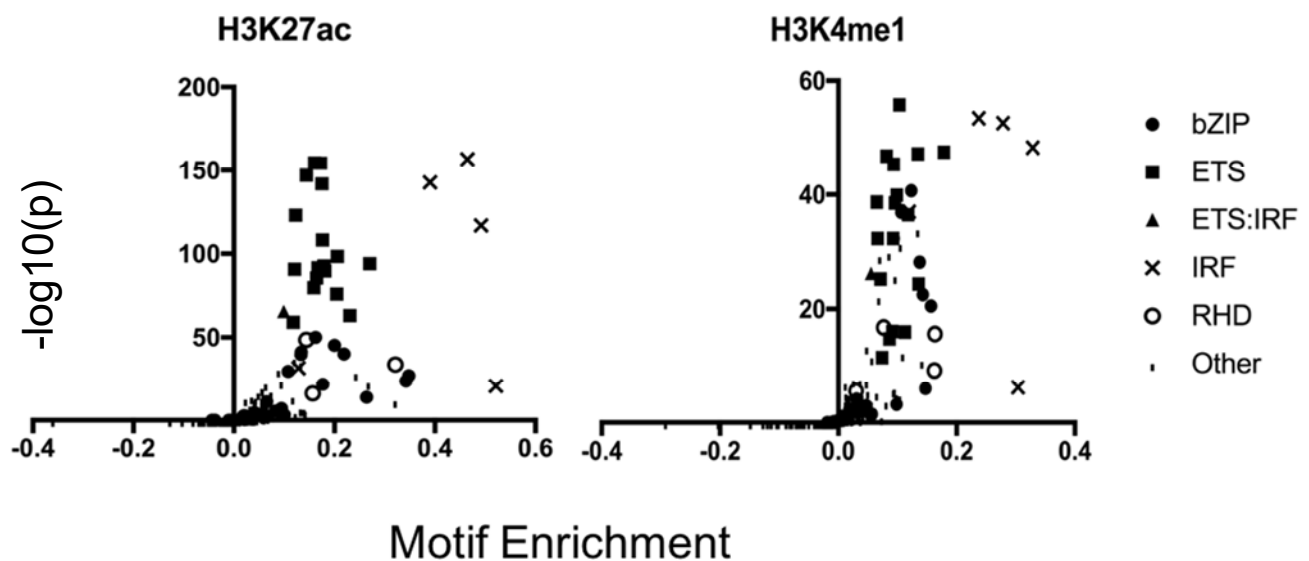

Supplementary Figure 4. Mirror plot of H3K27ac (top) and H3K4me1 (bottom) hQTL results for the HLA region on chromosome 6 (29.6 – 33.1 Mb). Y-axis is the  $-\log_{10}(p)$  from the CHT; chromosome position is plotted on the x-axis and Class I, II, and III positions are indicated by colored bars. Red horizontal line indicates the 10% FEWR threshold; blue horizontal line indicates the 20% FEWR threshold.

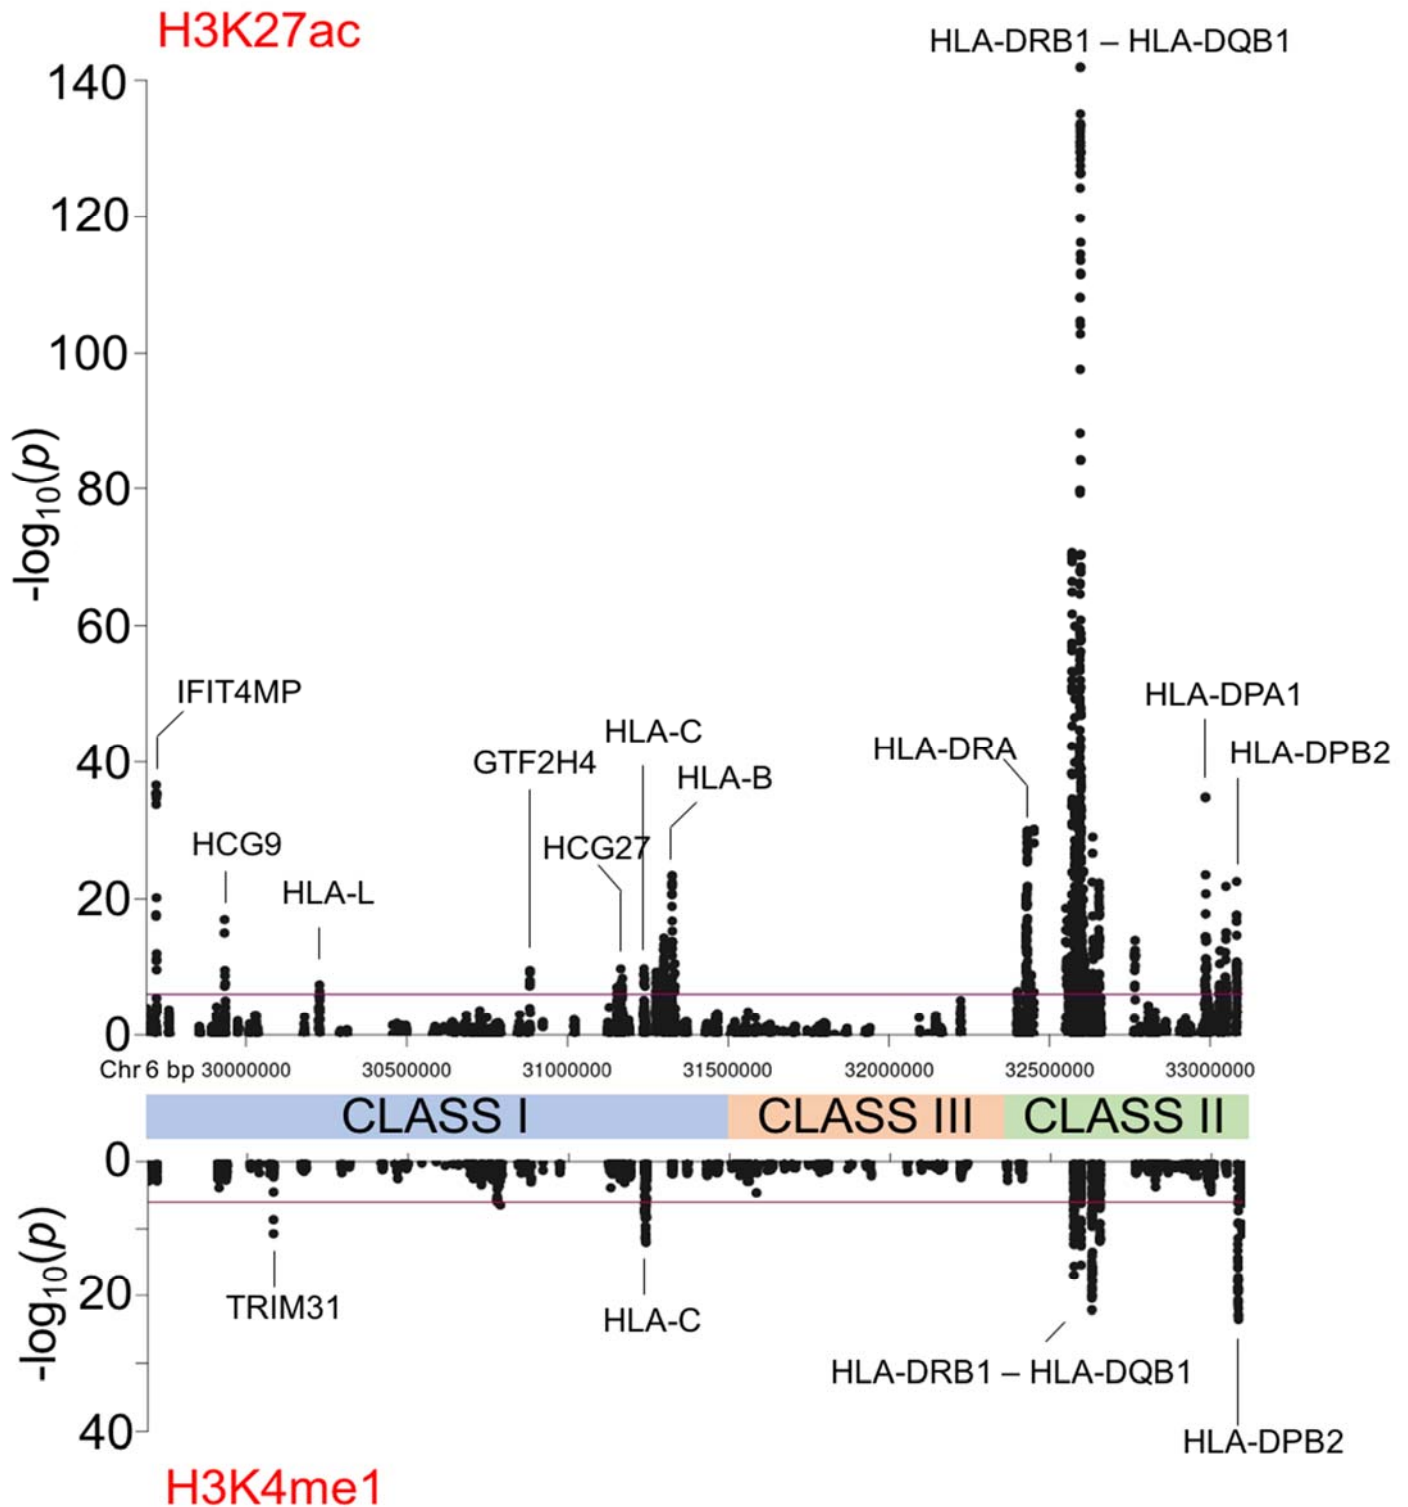

Supplementary Figure 5. Zoomed in HLA Class II region (32.54-32.64 Mb) showing haplotype-specific hQTLs separated by individuals heterozygous for the HLA-DR15 (top panel) or HLA-DR3 (bottom panel) haplotypes. hQTLs are colored by their  $r^2$  with the peak hQTL in each region.

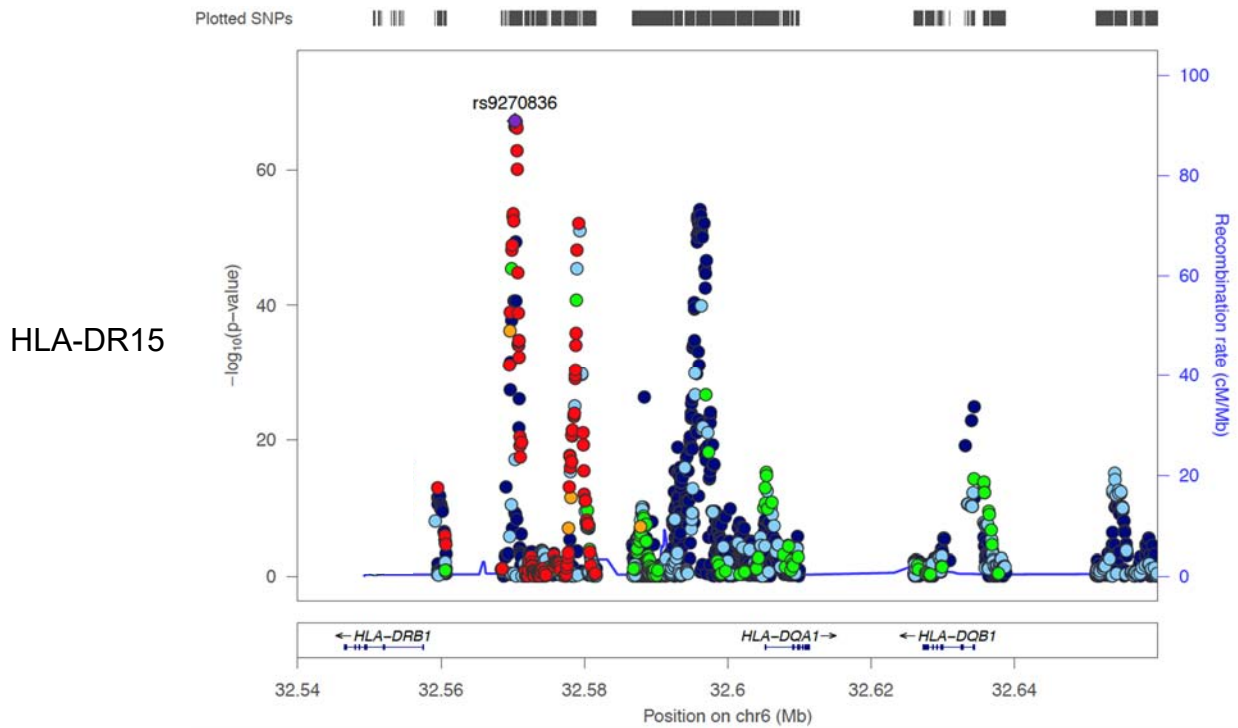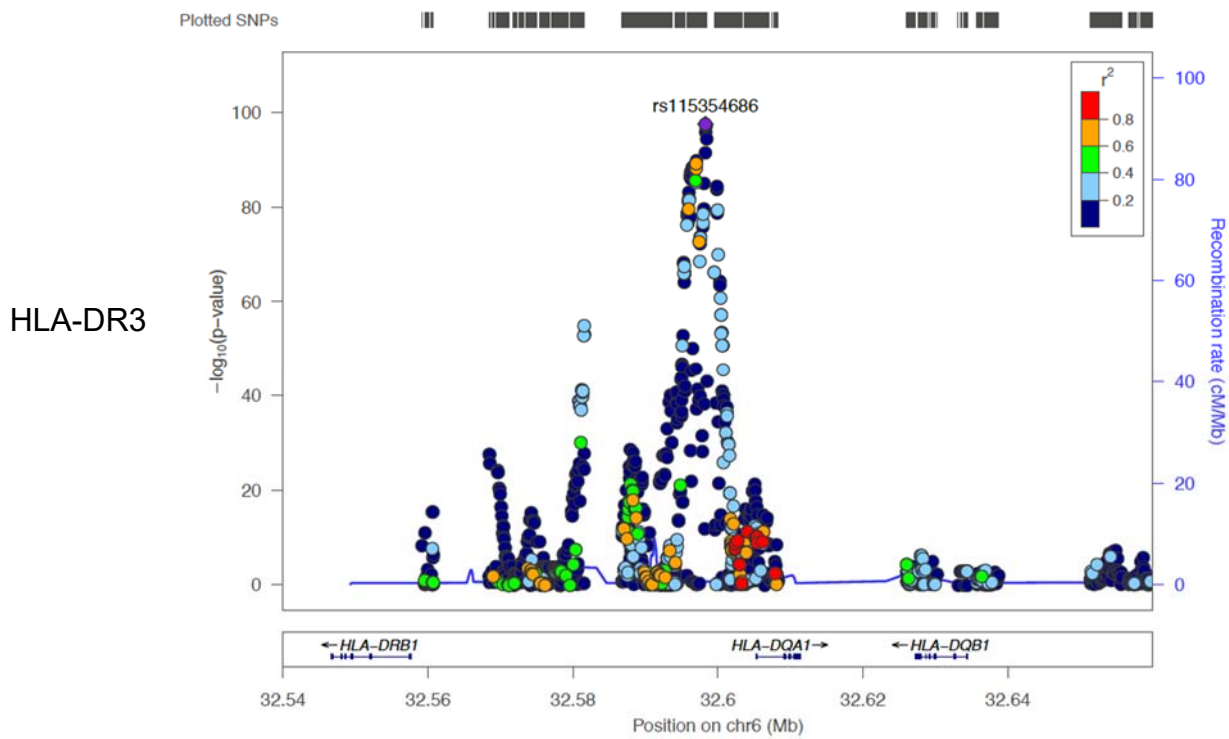

Supplementary Figure 6. HLA Class I hQTLs separated by individuals heterozygous for the HLA-DR15 (top panel) or HLA-DR3 (bottom panel) haplotypes. Y-axis is the  $-\log_{10}(p)$  from the CHT; chromosome position (Mb) is plotted on the x-axis. hQTLs are colored by the  $\log_2$  (DR15 allele specific reads / DR3 allele specific reads), with darker purple values (max = 3.68) indicating higher reads at a particular SNP in the HLA-DR15 samples compared to HLA-DR15 samples; stronger orange values (min = -3.04) indicating higher reads in the HLA-DR3 samples compared to HLA-DR15 samples at a particular SNP.

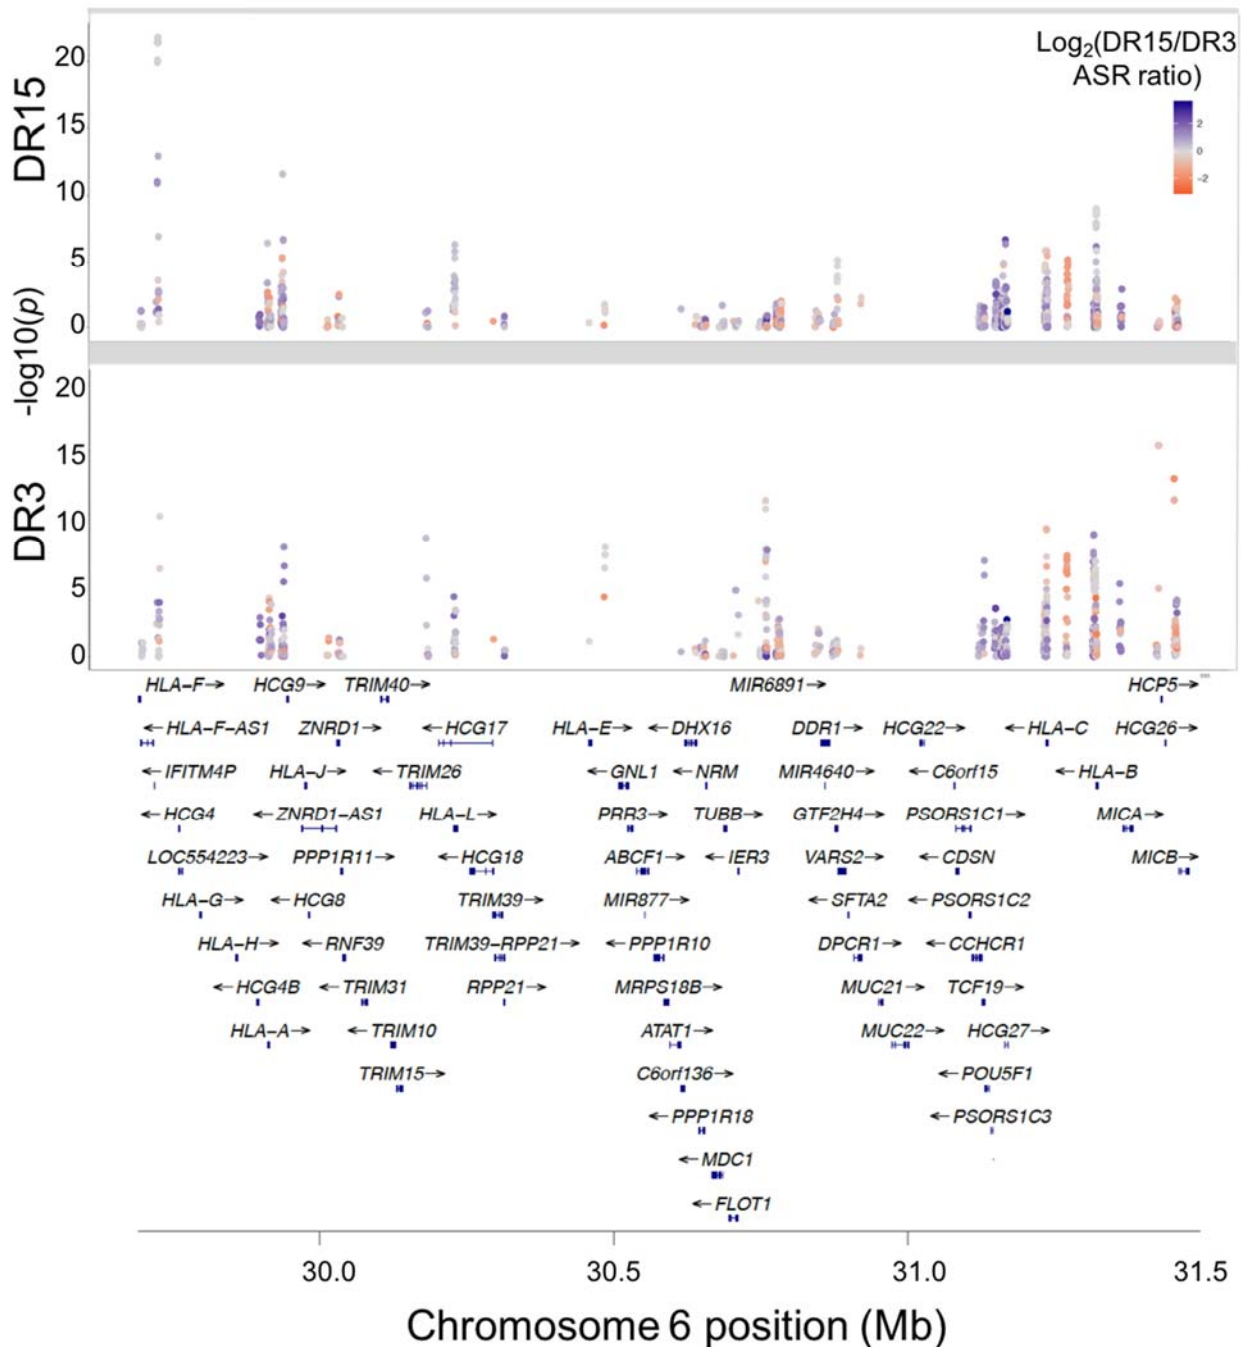

Supplementary Figure 7. HLA Class III hQTLs separated by individuals heterozygous for the HLA-DR15 (top panel) or HLA-DR3 (bottom panel) haplotypes. Y-axis is the  $-\log_{10}(p)$  from the CHT; chromosome position (Mb) is plotted on the x-axis. hQTLs are colored by the  $\log_2$  (DR15 allele specific reads / DR3 allele specific reads), with darker purple values (max = 3.25) indicating higher reads at a particular SNP in the HLA-DR15 samples compared to HLA-DR15 samples; stronger orange values (min = -4.62) indicating higher reads in the HLA-DR3 samples compared to HLA-DR15 samples at a particular SNP.

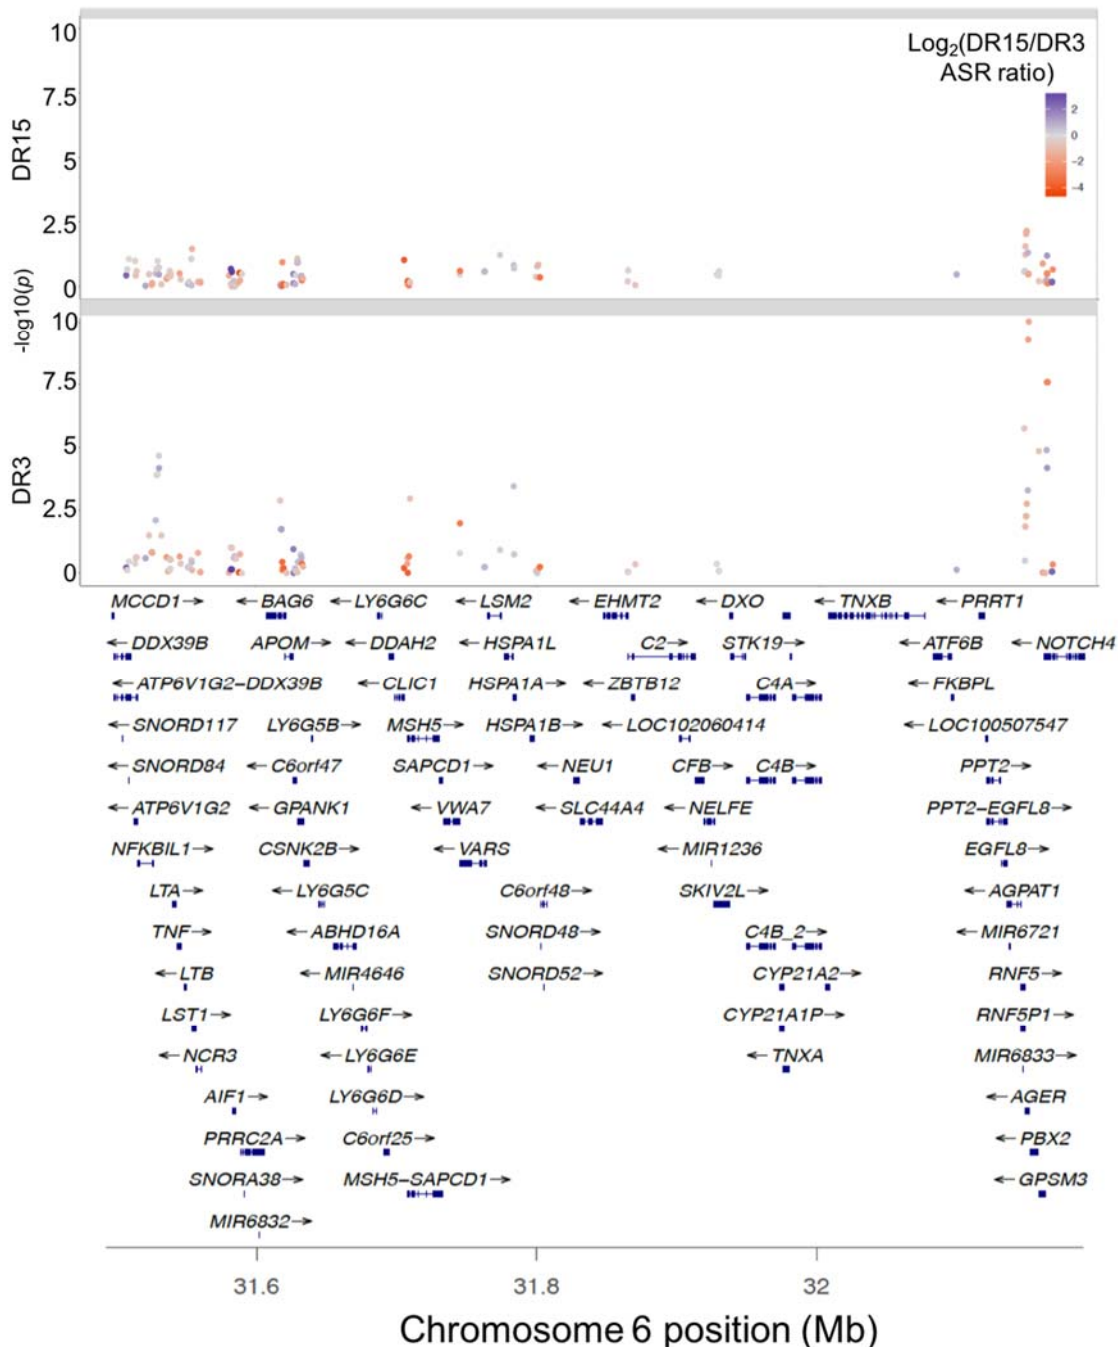



Supplementary Figure 8. CTCF Hi-ChIP and Hi-C data define insulated neighborhood around 32.5 Mb on chromosome 6 that includes HLA-DRA to HLA-DQB1. CTCF Hi-ChIP looping data are provided for a HLA-DR3 individual (top panel) and HLA-DR15 individual (middle panel). Heatmap of Hi-C data for GM12878 cell line is presented in bottom panel. CTCF data demonstrate similar looping and strength across the HLA-Class II region between the two HLA haplotypes except for in the region containing HLA-DRA to HLA-DQB1 (black box), which appears to be an insulated neighborhood as observed by the CTCF looping data and confirmed by TAD boundaries in the Hi-C data. Chromosome 6 positions (Mb) and important gene locations are provided along the bottom of the figure.

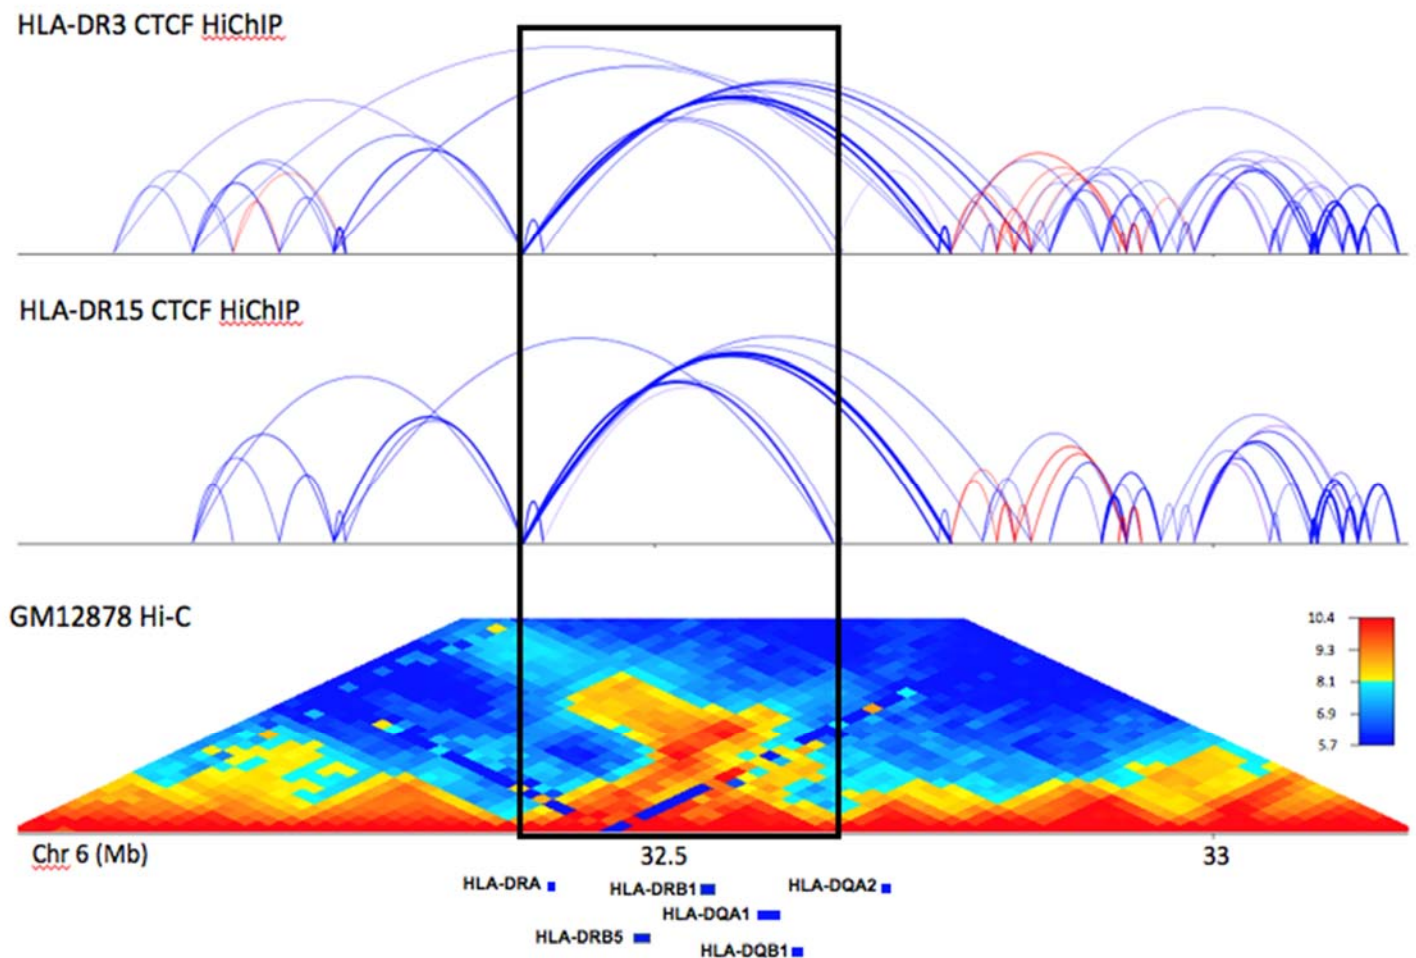

Supplementary Figure 9. Significant hQTL x eQTL distal interaction classification scheme. Spans of D' linkage disequilibrium (LD) are symbolized as hashed triangles. H3K27ac-mediated HiChIP interactions are depicted as dashed arcs and horizontal line segments for their anchor positions. The positions of hQTLs (solid dots) and eQTLs (circles) are indicated. The eQTL target gene is depicted as a bent arrow and exon-intron ideogram. The number and proportion of all significant distal interactions of each type are given. The majority of significant distal interactions are of the type where hQTLs interact distally with an eQTL target gene's chromatin network through chromatin looping. A. "Looped joint" interactions: the hQTL loops to the eQTL and eQTL target gene promoter, which are in LD. B. "Looped Disjoint" interactions: the hQTL loops directly to the eQTL target gene and the eQTL lies on a different haplotype block. C. "Shared anchor" interactions: LD-independent hQTL and eQTL are within the same loop anchor and interact with the eQTL target gene. D. "Shared anchor off-target" interactions: LD-independent hQTL and eQTL are within the same loop anchor and the significant interaction occurs with a gene that is not the eQTL target gene but is nevertheless within the 3D chromatin network of the hQTL. E. "Off-target" interactions: hQTL and eQTL are not within the same loop anchor and the significant interaction occurs with a gene that is not the eQTL target gene but is nevertheless within the 3D chromatin network of the hQTL. F. "Unanchored" interactions: the hQTL's haplotype block overlaps both a loop anchor and the eQTL target gene's regulatory area but is not explicitly covered by an interaction loop.

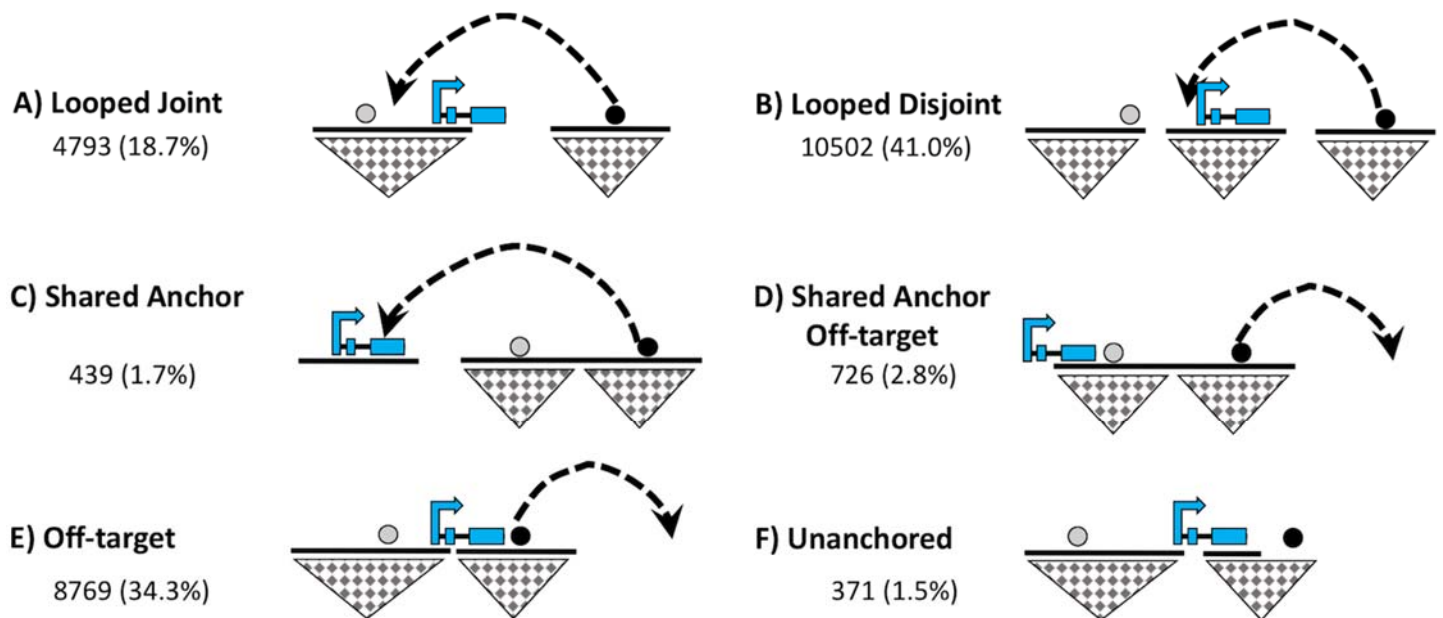

Supplementary Table 1. Distribution of p-values for 5,068 testable hQTLs in the 10-sample replication cohort.

| <b>Nominal p-value</b> | <b># Replicated SNPs</b> | <b>% Replicated SNPs</b> | <b>Cumulative %age</b> |
|------------------------|--------------------------|--------------------------|------------------------|
| < 0.000001             | 146                      | 2.88                     | 2.88                   |
| 0.00001 > X > 0.000001 | 88                       | 1.74                     | 4.62                   |
| 0.0001 > X > 0.00001   | 183                      | 3.61                     | 8.23                   |
| 0.001 > X > 0.0001     | 344                      | 6.79                     | 15.02                  |
| 0.01 > X > 0.001       | 621                      | 12.25                    | 27.27                  |
| 0.05 > X > 0.01        | 799                      | 15.77                    | 43.03                  |
| NS                     | 2887                     | 56.97                    | 100.0                  |

Supplementary Table 2. hQTLs are located within the chromatin network of autoimmune disease risk genes.

| Autoimmune Disease               | Risk Gene*                                                                                                                                                                                                                                                                                                                                                                                                                                                                                                                                                           |
|----------------------------------|----------------------------------------------------------------------------------------------------------------------------------------------------------------------------------------------------------------------------------------------------------------------------------------------------------------------------------------------------------------------------------------------------------------------------------------------------------------------------------------------------------------------------------------------------------------------|
| Ankylosing Spondylitis           | B3GNT2; CARD9; HLA-B; RUNX3                                                                                                                                                                                                                                                                                                                                                                                                                                                                                                                                          |
| Behcet's disease                 | HCG22; MICA; MICB                                                                                                                                                                                                                                                                                                                                                                                                                                                                                                                                                    |
| Celiac disease                   | CIITA; CLEC16A; ELMO1; <b>HLA-DQA1</b> ; HLA-DQB1; ICOSLG; IRF4; ITGA4; KLK15; PFKFB3; PLEK; RGS1; RUNX3; SOCS1; TNFAIP3; UBASH3A; UBE2L3; YDJC                                                                                                                                                                                                                                                                                                                                                                                                                      |
| Crohn's disease                  | AIF1; AKAP1; <b>ADCY3</b> ; CCR6; CD244; CD27; CNTNAP2; DCLRE1B; DNMT3A; ELF1; ERAP2; ESRRA; GALC; <b>GLYAT</b> ; <b>GPR35</b> ; GRP65; GPX4; <b>GSDMB</b> ; HLA-DRA; <b>HLA-DRB1</b> ; HLA-DQA1; ICOSLG; IFNGR2; IFNAR1; IFNAR2; IKZF3; IL2RA; INPP5D; IRF4; JAK2; KLF3; LACC1; <b>LITAF</b> ; NOTCH4; ORMDL3; PBX2; PDCD1; PLCL1; PTK2B; PTPN22; <b>RASGRP1</b> ; RBX1; REL; <b>RNASET2</b> ; RUNX3; SLC25A28; SCL2A4RG; SLC43A3; SMNDC1; SP140; SPRED1; SYK; TBC1D1; TEF; THADA; TNFRSF1A; TNFSF8; TNFSF11; WBP4; YDJC; ZNF767P; <b>ZFP91-CNTF</b> ; <b>ZPBP2</b> |
| Dermatomyositis                  | PLCL1                                                                                                                                                                                                                                                                                                                                                                                                                                                                                                                                                                |
| Graves' disease                  | C1QTNF6; HLA-A; HLA-B; <b>HLA-G</b> ; RHOH; <b>RNASET2</b>                                                                                                                                                                                                                                                                                                                                                                                                                                                                                                           |
| Kawasaki disease                 | <b>BLK</b> ; <b>FAM167A</b> ; FCGR2A; <b>HLA-DOB</b> ; <b>HLA-DQB2</b> ; PELI1                                                                                                                                                                                                                                                                                                                                                                                                                                                                                       |
| Multiple sclerosis               | ALPK2; BATF; BOD1L2; BTNL2; CBLB; CD86; CHST12; CLEC16A; <b>CLECL1</b> ; <b>DIRAS2</b> ; <b>DKKL1</b> ; EXTL2; FBXO48; GPR65; HLA-B; <b>HLA-DQA1</b> ; HLA-DQB1; <b>HLA-DRA</b> ; <b>HLA-DRB1</b> ; <b>HLA-DRB5</b> ; IL22RA2; IL2RA; IL7; ILDR1; <b>IRF8</b> ; <b>LINC-ROR</b> ; MAP3K14; MAPK1; MPHOSPH9; MYB; NFKBIZ; ODF3B; PLCL2; PLEK; RGS1; RREB1; SAE1; SCL30A7; SP140; <b>SYK</b> ; TCF7; THADA; TNFRSF1A; VAV2; YWHAG; ZBTB46; <b>ZNF767</b>                                                                                                               |
| Myesthenia gravis                | HLA-DQA1; <b>HLA-DRB1</b> ; PTPN22                                                                                                                                                                                                                                                                                                                                                                                                                                                                                                                                   |
| Myositis                         | ATP6V1G2; DDX39B; HCP5; HLA-B; HLA-C; HLA-DPA1; HLA-DPB1; HLA-DQA1; HLA-DQB1; HLA-DRB1; MICB                                                                                                                                                                                                                                                                                                                                                                                                                                                                         |
| Primary biliary cirrhosis        | CCDC88B; CLEC16A; EXO3L4; GSDMB; HLA-DQB1; IKZF3; <b>IRF8</b> ; NAB1; ORMDL3; PLCL2; RPS6KA4; SOCS1; SPIB; SYNGR1; TNFRSF1A                                                                                                                                                                                                                                                                                                                                                                                                                                          |
| Psoriasis                        | AKAP13; B3GNT2; <b>CLIC6</b> ; ELMO1; EXOC2; HLA-C; IFNAR1; IL13; IRF4; NFKBIA; NFKBIZ; PLCL2; PSMA6; REL; REV3L; RUNX1; TNFAIP3; TRAF3IP2                                                                                                                                                                                                                                                                                                                                                                                                                           |
| Rheumatoid arthritis             | ABHD6; AIRE; APOM; B3GNT2; BATF; <b>BLK</b> ; C1QBP; CCR6; CD83; CLNK; <b>FAM167A</b> ; FCGR2A; GATA3; <b>GCH1</b> ; <b>GSDMB</b> ; HLA-DQA1; <b>HLA-DRA</b> ; <b>HLA-DRB1</b> ; <b>HLA-DRB5</b> ; IFNGR2; IKZF3; IL2RA; IL2RB; IL6R; INPP5B; IRF4; IRF8; MED1; MTF1; <b>N4BP1</b> ; NFKBIE; PLCL2; PLD4; <b>PPIL4</b> ; PRKCH; PTPN22; PXX; RAD51B; <b>RASGRP1</b> ; RCAN1; REL; RUNX1; SPRED2; SYNGR1; TEC; TNFAIP3; TPD52; TXNDC11; <b>UBASH3A</b> ; UBE2L3; WDFY4; YDJC; XNF774; <b>ZPBP2</b>                                                                    |
| Sarcoidosis                      | CCDC88B                                                                                                                                                                                                                                                                                                                                                                                                                                                                                                                                                              |
| Scleroderma (systemic sclerosis) | <b>HLA-DPA1</b> ; <b>HLA-DPB1</b> ; HLA-DQB1; <b>HLA-DRA</b> ; <b>HLA-DRB1</b> ; <b>HLA-DQA1</b> ; IRF8; NOTCH4                                                                                                                                                                                                                                                                                                                                                                                                                                                      |
| Sjögren's syndrome               | <b>BLK</b> ; <b>HLA-DPB1</b> ; <b>HLA-DQA1</b> ; <b>HLA-DRA</b> ; <b>HLA-DRB1</b> ; TNFAIP3                                                                                                                                                                                                                                                                                                                                                                                                                                                                          |
| Systemic lupus erythematosus     | ABHD6; APOBEC4; BIN1; <b>BLK</b> ; C2; CDKN1B; CIITA; CLEC16A; CREBL2; CSNK2B; DRAB1; EDEM3; ELF1; <b>FAM167A</b> ; FAM98B; FCGR2A; GATA3; GPR19; GRP2; <b>HCG27</b> ; HLA-A; HLA-B; <b>HLA-DQA1</b> ; HLA-DQB1; <b>HLA-DRA</b> ; <b>HLA-DRB1</b> ; IKZF1; IKZF2; IKZF3; IRF7; IRF8; KDM4C; LAMC1; LCP1; LINC00271; LOC105369519; LYST; MED1; MSH5; NCF2; NOTCH4; <b>OVOL1</b> ; <b>PHLDB1-CXCR5</b> ; PLD2; PTPN22; <b>PXX</b> ; RABGAP1L; RAD51B; RASSF2; <b>SLC15A4</b> ; SMG7; SOCS1; SPRED2; TCF7; TFNAIP3; UBE2L3; UHRF1BP1; WDFY4; YDJC; ZNF184               |
| Type I diabetes                  | C1QTNF6; CD69; CLEC16A; CTSH; <b>GSDMB</b> ; <b>HLA-DRA</b> ; HLA-DRB1; IL2RA; LMO7; ORMDL3; PGM1; PHTF1; PTPN22; <b>RASGRP1</b> ; <b>UBASH3A</b> ; <b>ZPBP2</b>                                                                                                                                                                                                                                                                                                                                                                                                     |
| Ulcerative colitis               | <b>ADCY3</b> ; AHR; <b>CALM3</b> ; CARD9; CDH1; CEP72; CIITA; CNTNAP2; DAP; EXOC3; FCGR2A; <b>GLYAT</b> ; <b>GNA12</b> ; <b>GPR35</b> ; <b>GSDMB</b> ; HCG9; HDAC9; HLA-A; <b>HLA-DQA1</b> ; <b>HLA-DQB1</b> ; <b>HLA-DRA</b> ; <b>HLA-DRB1</b> ; HLA-DRB5; <b>HLA-G</b> ; <b>ICOSLG</b> ; IER3; IKZF3; IL17REL; IRF8; JAK2; <b>LITAF</b> ; LSP1; NFKBIZ; NOTCH4; <b>PTGIR</b> ; SLC9A3; TNFRSF6B; TNFSF8; ZFP90; <b>ZFP91-CNTF</b> ; <b>ZPBP2</b>                                                                                                                   |
| Vitiligo                         | C1QTNF6; CASP7; CCR6; CLNK; HLA-A; HLA-B; HLA-C; <b>HLA-DQA1</b> ; HLA-DRA; IL2RA; PTPN22; RBM17; RERE; <b>RNASET2</b> ; TOB2; <b>UBASH3A</b>                                                                                                                                                                                                                                                                                                                                                                                                                        |
| Wegener's disease                | DCTD; <b>HLA-DPB1</b> ; SEMA6A                                                                                                                                                                                                                                                                                                                                                                                                                                                                                                                                       |

\*Listed autoimmune disease risk genes that either 1) contain hQTLs within reported risk haplotypes (red) or 2) interact with hQTLs through chromatin looping events (black). Index SNP and risk gene data were downloaded from the NHGRI-EPI catalog of Published Genome-wide Association Studies database October 17, 2016. Risk haplotypes were constructed around the reported index SNP based on linkage disequilibrium ( $D' > 0.8$ ) via haploview.

Supplementary Table 3. H3K27ac ChIP-sequencing statistics from our population of 25 LCLs.

| ID | Histone mark | Input reads | Trimmed reads | Decontaminated reads | Initial total mapped reads | Initial unique mapped reads | Remappable reads | Reference overlapping reads | Alternate overlapping reads | Successfully mapped reads |
|----|--------------|-------------|---------------|----------------------|----------------------------|-----------------------------|------------------|-----------------------------|-----------------------------|---------------------------|
| 1  | H3K27ac      | 126726111   | 121981105     | 119156192            | 108691418                  | 18742607                    | 11894873         | 10014628                    | 3107708                     | 11510397                  |
| 2  | H3K27ac      | 51894146    | 51805454      | 88170385             | 81218341                   | 13598448                    | 9072516          | 7647793                     | 2357318                     | 8783037                   |
| 3  | H3K27ac      | 97066197    | 95476618      | 93186936             | 86292585                   | 13704622                    | 9554843          | 8097934                     | 2457578                     | 9237044                   |
| 4  | H3K27ac      | 70080544    | 67881775      | 66077601             | 59046449                   | 11081976                    | 6570357          | 5507262                     | 1715440                     | 6352214                   |
| 5  | H3K27ac      | 86587577    | 85116332      | 83031516             | 74592377                   | 13708569                    | 8309383          | 6987059                     | 2168066                     | 8033338                   |
| 6  | H3K27ac      | 104588193   | 102903830     | 100669400            | 92995385                   | 15068932                    | 10268693         | 8642122                     | 2658122                     | 9961928                   |
| 7  | H3K27ac      | 63956631    | 63648163      | 67985551             | 62732176                   | 11428475                    | 6900947          | 5828758                     | 1787737                     | 6661867                   |
| 8  | H3K27ac      | 92461013    | 90405720      | 87988934             | 79220355                   | 14430096                    | 8826382          | 7423588                     | 2304227                     | 8529159                   |
| 9  | H3K27ac      | 74946927    | 74141316      | 72355318             | 66758626                   | 11903217                    | 7308099          | 6155449                     | 1893137                     | 7068724                   |
| 10 | H3K27ac      | 72000836    | 71019464      | 69353982             | 63908674                   | 11253059                    | 6931168          | 5865412                     | 1778565                     | 6704258                   |
| 11 | H3K27ac      | 95768531    | 95402165      | 67131757             | 61942896                   | 11264862                    | 6713150          | 5681170                     | 1725606                     | 6482318                   |
| 12 | H3K27ac      | 85409933    | 84782315      | 82480340             | 74999197                   | 13580940                    | 8252778          | 6921872                     | 2149973                     | 7983985                   |
| 13 | H3K27ac      | 47940418    | 47035198      | 45798126             | 39652823                   | 7421453                     | 4553552          | 3834589                     | 1193757                     | 4386596                   |
| 14 | H3K27ac      | 68409834    | 67897122      | 70276100             | 64640548                   | 11615691                    | 6973662          | 5913810                     | 1778999                     | 6733550                   |
| 15 | H3K27ac      | 72998716    | 72244050      | 70545967             | 65027133                   | 11730515                    | 7087905          | 5967052                     | 1826316                     | 6858664                   |
| 16 | H3K27ac      | 98391992    | 95841314      | 93506778             | 86304667                   | 13871447                    | 9573543          | 8089248                     | 2470434                     | 9253484                   |
| 17 | H3K27ac      | 50131921    | 49605217      | 48395409             | 42046194                   | 7785395                     | 4794640          | 4043029                     | 1249044                     | 4624352                   |
| 18 | H3K27ac      | 54544342    | 53616154      | 52351885             | 48322241                   | 8974970                     | 5330327          | 4481626                     | 1386417                     | 5155045                   |
| 19 | H3K27ac      | 57900423    | 57751651      | 67920884             | 62467950                   | 11412611                    | 6802306          | 5728880                     | 1742547                     | 6572776                   |
| 20 | H3K27ac      | 81530738    | 81501873      | 64388802             | 59485207                   | 10555021                    | 6475131          | 5454940                     | 1683371                     | 6259814                   |
| 21 | H3K27ac      | 199961706   | 191607671     | 187254435            | 171273995                  | 29394978                    | 19015220         | 16132005                    | 4878349                     | 18401178                  |
| 22 | H3K27ac      | 125572347   | 125432279     | 69876769             | 64423827                   | 11535220                    | 7001861          | 5903313                     | 1806833                     | 6772296                   |
| 23 | H3K27ac      | 103877045   | 103714066     | 70240415             | 65031462                   | 11532288                    | 7019326          | 5910975                     | 1818132                     | 6786974                   |
| 24 | H3K27ac      | 205047631   | 200681482     | 196331727            | 180253433                  | 31341219                    | 19681047         | 16693199                    | 5063274                     | 19033672                  |
| 25 | H3K27ac      | 181183405   | 177735499     | 173923461            | 159139267                  | 26933314                    | 17404162         | 14643229                    | 4542410                     | 16850486                  |

The number of reads at each step of the data processing pipeline are given: the total # of sequences obtained from the sequencer (input reads), the # of reads surviving subsequent filtering steps via Trimmomatic (trimmed reads) and removal of contaminant reads (decontaminated reads), the # of unique filtered reads before alignment (unique filtered reads), the # of reads aligning to the human reference genome (initial total mapped reads), the # of uniquely mapped reads (initial unique mapped reads), the # of reads overlapping SNPs segregating in the LCL population (remappable reads), the # of remappable reads matching the reference and alternate allele (overlapping reads), and the # of overlapping reads which are successfully remapped to correct reference genome bias (successfully remapped reads).

Supplementary Table 4. H3K27ac ChIP-sequencing statistics from our population of 25 LCLs.

| ID | Histone mark | Input reads | Trimmed reads | Decontaminated reads | Initial total mapped reads | Initial unique mapped reads | Remappable reads | Reference overlapping reads | Alternate overlapping reads | Successfully mapped reads |
|----|--------------|-------------|---------------|----------------------|----------------------------|-----------------------------|------------------|-----------------------------|-----------------------------|---------------------------|
| 1  | H3K4me1      | 157513130   | 155477832     | 150870705            | 138593598                  | 23750223                    | 15071456         | 12604563                    | 3902703                     | 14559231                  |
| 2  | H3K4me1      | 115330642   | 112533924     | 119769271            | 110411539                  | 17911514                    | 12118390         | 10141354                    | 3140816                     | 11697184                  |
| 3  | H3K4me1      | 123904541   | 122236447     | 119005013            | 109144055                  | 17949885                    | 11981690         | 10031101                    | 3107696                     | 11559282                  |
| 4  | H3K4me1      | 154434981   | 150041779     | 145619985            | 130778606                  | 22312108                    | 14682830         | 12331693                    | 3810070                     | 14169701                  |
| 5  | H3K4me1      | 154695507   | 152880185     | 148423830            | 134746760                  | 22764857                    | 15026740         | 12611381                    | 3896829                     | 14521604                  |
| 6  | H3K4me1      | 109521443   | 105490931     | 102352778            | 94052852                   | 15430984                    | 10234242         | 8553080                     | 2645458                     | 9877405                   |
| 7  | H3K4me1      | 102264676   | 100705619     | 143675958            | 127620389                  | 23551397                    | 14655396         | 12272751                    | 3835984                     | 14111584                  |
| 8  | H3K4me1      | 181476599   | 178608189     | 173184649            | 156435071                  | 26114025                    | 17554907         | 14741009                    | 4557556                     | 16944585                  |
| 9  | H3K4me1      | 185190699   | 184422793     | 179526142            | 159229897                  | 29314876                    | 17952282         | 14994302                    | 4741335                     | 17280146                  |
| 10 | H3K4me1      | 196100381   | 195178275     | 190029013            | 168122903                  | 30916952                    | 18942040         | 15843418                    | 4985723                     | 18237363                  |
| 11 | H3K4me1      | 95746337    | 94512136      | 132632532            | 117869464                  | 21820136                    | 13466302         | 11257126                    | 3537741                     | 12969097                  |
| 12 | H3K4me1      | 128977400   | 128216612     | 124370950            | 112675473                  | 19152103                    | 12453549         | 10430946                    | 3229599                     | 12021036                  |
| 13 | H3K4me1      | 267196379   | 263103512     | 256640191            | 226121157                  | 37426103                    | 24997250         | 21025210                    | 6466271                     | 23960844                  |
| 14 | H3K4me1      | 69581933    | 68002996      | 147787508            | 131123671                  | 24153699                    | 14735646         | 12339166                    | 3857721                     | 14179369                  |
| 15 | H3K4me1      | 143846967   | 143186280     | 139205232            | 123190500                  | 22919597                    | 13912044         | 11638355                    | 3657432                     | 13390270                  |
| 16 | H3K4me1      | 261128097   | 256618511     | 249335215            | 229470053                  | 37149656                    | 24999890         | 20875919                    | 6503570                     | 24155968                  |
| 17 | H3K4me1      | 51041606    | 50551699      | 49147652             | 43151692                   | 7922417                     | 4916658          | 4143360                     | 1273619                     | 4738862                   |
| 18 | H3K4me1      | 143058368   | 142380814     | 138692001            | 123296510                  | 22848883                    | 13893018         | 11607831                    | 3661932                     | 13381864                  |
| 19 | H3K4me1      | 119028150   | 115961661     | 150406123            | 133364251                  | 24551574                    | 15275651         | 12798576                    | 3984130                     | 14703582                  |
| 20 | H3K4me1      | 133120758   | 130524030     | 190331719            | 168752350                  | 30652605                    | 19026529         | 15905238                    | 5009847                     | 18318722                  |
| 21 | H3K4me1      | 145207294   | 143293335     | 138945610            | 127593183                  | 22241421                    | 13953620         | 11699592                    | 3590952                     | 13467522                  |
| 22 | H3K4me1      | 125263941   | 125171950     | 136088800            | 121111889                  | 22505304                    | 13659422         | 11437594                    | 3584175                     | 13145700                  |
| 23 | H3K4me1      | 99238833    | 98981480      | 143709970            | 127812687                  | 23609339                    | 14409348         | 12042545                    | 3795719                     | 13869048                  |
| 24 | H3K4me1      | 136129630   | 134599895     | 130588634            | 119850954                  | 20807027                    | 13089868         | 10981967                    | 3364192                     | 12641615                  |
| 25 | H3K4me1      | 179706519   | 177678923     | 172239239            | 159173942                  | 27141696                    | 17301384         | 14446733                    | 4486567                     | 16707777                  |

The number of reads at each step of the data processing pipeline are given: the total # of sequences obtained from the sequencer (input reads), the # of reads surviving subsequent filtering steps via Trimmomatic (trimmed reads) and removal of contaminant reads (decontaminated reads), the # of unique filtered reads before alignment (unique filtered reads), the # of reads aligning to the human reference genome (initial total mapped reads), the # of uniquely mapped reads (initial unique mapped reads), the # of reads overlapping SNPs segregating in the LCL population (remappable reads), the # of remappable reads matching the reference and alternate allele (overlapping reads), and the # of overlapping reads which are successfully remapped to correct reference genome bias (successfully remapped reads).

Supplementary Table 5. H3K27ac and CTCF HiChIP-sequencing statistics for samples heterozygous for the HLA-DR3 (N=3) or HLA-DR15 (N=3) haplotypes.

| Sample number | HLA Haplotype | H3K27ac HiChIP |                           | CTCF HiChIP |                           |
|---------------|---------------|----------------|---------------------------|-------------|---------------------------|
|               |               | Total PETs     | % long range interactions | Total PETs  | % long range interactions |
| 1             | HLA-DR3       | 231132809      | 23.51                     | 92390968    | 21.34                     |
| 2             | HLA-DR3       | 41845040       | 23.37                     | 50680134    | 20.35                     |
| 3             | HLA-DR3       | 39640737       | 21.96                     | 39376017    | 19.81                     |
| 4             | HLA-DR15      | 65520972       | 27.15                     | 107042962   | 22.08                     |
| 5             | HLA-DR15      | 35509764       | 23.19                     | 35335748    | 21.22                     |
| 6             | HLA-DR15      | 52729360       | 21.22                     | 53873305    | 17.01                     |

PETs: Paired end tags; Samples had to have a minimum of 15% long interactions to pass stringent quality control.
